# Supplementary material
Source: Springer Nature journal article supplement (https://www.springermedizin.de/resource/supplementary/12885_2014_4606_MOESM2_ESM.pdf/9466794)

**A****Probability**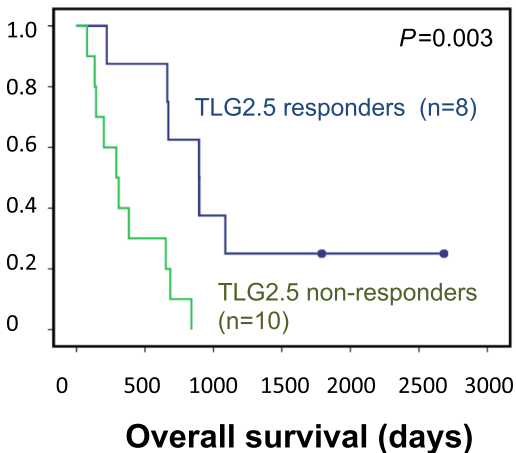**B****Probability**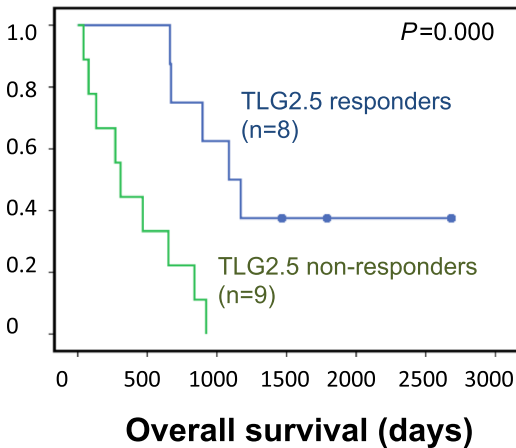

Supplement: MOESM2 [file 9466794]
